# Supplementary material
Source: publisher site journal article supplement (https://www.spandidos-publications.com/6805/downloadSupplementary)
Supplement: Supplementary file 1 [file downloadSupplementary]

## Sheet: Sheet1
Table SXII. Kyoto Encyclopedia of Genes and Genomes pathway corresponding to target genes of downregulated piwi-interacting RNAs.
Term	P-value	Adjusted P-value	Combined score
Diabetic cardiomyopathy	0.0091853	0.982076	11.8145
Protein digestion and absorption	0.0191697	0.982076	11.832
Insulin signaling pathway	0.0227113	0.982076	9.86614
Insulin resistance	0.0235941	0.982076	10.6584
Huntington disease	0.0242339	0.982076	7.38034
Glycine, serine and threonine metabolism	0.0480579	0.982076	11.8533
Natural killer cell mediated cytotoxicity	0.0525696	0.982076	6.82951
AGE-RAGE signaling pathway in diabetic complications	0.054441	0.982076	7.39262
Focal adhesion	0.055132	0.982076	5.81095
Chronic myeloid leukemia	0.0702796	0.982076	7.1095
